# Supplementary material for: Sirt3 Exerts Its Tumor-Suppressive Role by Increasing p53 and Attenuating Response to Estrogen in MCF-7 Cells
Source: PubMed Central journal article supplement (PMC7222218; doi:10.3390/antiox9040294), 2020-04-01
Supplement: antioxidants-09-00294-s001.pdf [file antioxidants-09-00294-s001.pdf]

# Sirt3 Exerts Its Tumor-Suppressive Role by Increasing p53 and Attenuating Response to Estrogen in MCF-7 Cells

Marija Pinterić <sup>1,†</sup>, Iva I. Podgorski <sup>1,†</sup>, Marijana Popović Hadžija <sup>1</sup>, Vedrana Filić <sup>2</sup>  
Mladen Paradžik <sup>2,3</sup>, Bastien Lucien Jean Proust <sup>1</sup>, Ana Dekanić <sup>1</sup>, Ivan Ciganek <sup>1</sup>, Denis Pleše <sup>1</sup>,  
Dora Marčinko <sup>1</sup>, Tihomir Balog <sup>1</sup> and Sandra Sobočanec <sup>1,\*</sup>

<sup>1</sup> Division of Molecular Medicine, Ruđer Bošković Institute, 10000 Zagreb, Croatia; mpinter@irb.hr (M. Pinterić); iskrinj@irb.hr (I.I.P.); mhadzija@irb.hr (M.P.H.); Bastien.Lucien.Jean.Proust@irb.hr (B.L.J.P.); adekanic@irb.hr (A.D.); iciganek@stud.biol.pmf.hr (I.C.); dplese@pharma.hr (D.P.); dora.marcinko@krka.biz (D.M.); balog@irb.hr (T.B.)

<sup>2</sup> Division of Molecular Biology, Ruđer Bošković Institute, 10000 Zagreb, Croatia; Vedrana.Filic.Mileta@irb.hr (V.F.); Mladen.Paradzic@irb.hr (M. Paradžik)

<sup>3</sup> Department Molecular Biotechnology and Health Sciences, Molecular Biotechnology Centre (MBC), University of Torino, 10124 Torino, Italy

\* Correspondence: ssoboc@irb.hr; Tel.: +385-1-4561-172

† These authors contributed equally to this work

Received: 25 February 2020; Accepted: 30 March 2020; Published: date

**Table S1.** Antibodies used in this study for Western blot analyses.

| Antibody                           | Dilution | Host   | Manufacturer                  |
|------------------------------------|----------|--------|-------------------------------|
| Sirt3 (F-10, sc-365175)            | 1:500    | Mouse  | Santa Cruz Biotechnology, USA |
| ER- $\alpha$ (F-10, sc-8002)       | 1:500    | Mouse  | Santa Cruz Biotechnology, USA |
| GAPDH (ab9485)                     | 1:5000   | Mouse  | Abcam, UK                     |
| H3 (ab1791)                        | 1:3000   | Rabbit | Abcam, UK                     |
| NDUFA9 (ab14713)                   | 1:1000   | Mouse  | Abcam, UK                     |
| UQCRC (ab14745)                    | 1:1000   | Mouse  | Abcam, UK                     |
| ATP5A (ab14748)                    | 1:1000   | Mouse  | Abcam, UK                     |
| SDHA (ab14715)                     | 1:1000   | Mouse  | Abcam, UK                     |
| AcSOD2 (ab137037)                  | 1:1000   | Rabbit | Abcam, UK                     |
| Catalase (ab1877)                  | 1:1000   | Rabbit | Abcam, UK                     |
| Nrf2 (ab31163)                     | 1:1000   | Rabbit | Abcam, UK                     |
| p53 (DO-1, sc-126)                 | 1:2000   | Mouse  | Santa Cruz Biotechnology, USA |
| AIF (B-9, sc-55519)                | 1:500    | Mouse  | Santa Cruz Biotechnology, USA |
| gamma H2AX (phospho S139, ab11174) | 1:8000   | Rabbit | Abcam, UK                     |
| Anti-mouse (170-6516)              | 1:5000   | Goat   | Bio-rad, USA                  |
| Anti-rabbit (NA934)                | 1:5000   | Goat   | GE Healthcare, USA            |

**Table S2.** Antibodies used in this study for immunofluorescence analyses.

| Antibody                           | Dilution | Host   | Manufacturer                  |
|------------------------------------|----------|--------|-------------------------------|
| Sirt3 (F-10, sc-365175)            | 1:100    | Mouse  | Santa Cruz Biotechnology, USA |
| ER- $\alpha$ (ab16660)             | 1:500    | Rabbit | Abcam, UK                     |
| gamma H2AX (phospho S139, ab11174) | 1:5000   | Rabbit | Abcam, UK                     |
| Alexa 488 (A-11001)                | 1:2000   | Mouse  | Thermo Fisher Scientific, USA |
| Alexa 594 (A-11012)                | 1:1000   | Rabbit | Thermo Fisher Scientific, USA |

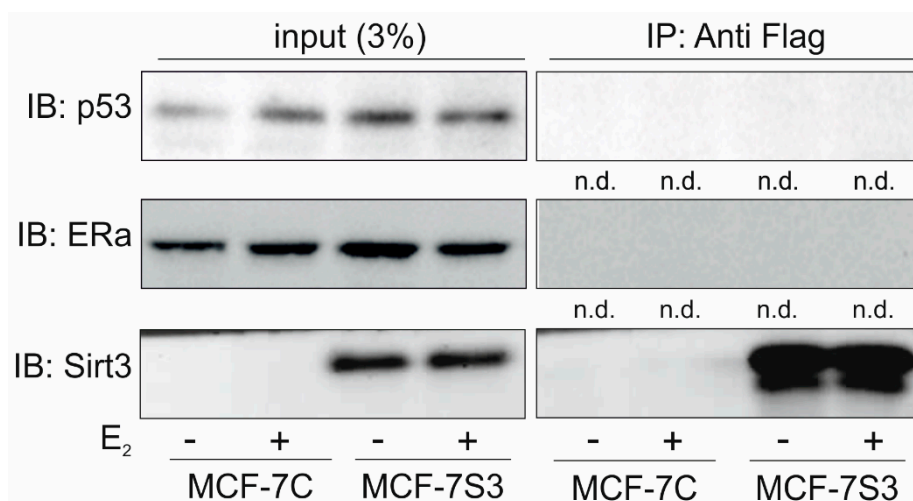**Figure S1.** Sirt3 does not interact with p53 or ER- $\alpha$  in MCF-7 cells. Western blot analysis of coimmunoprecipitation experiment showing no interaction between Sirt3 and ER- $\alpha$  or p53.

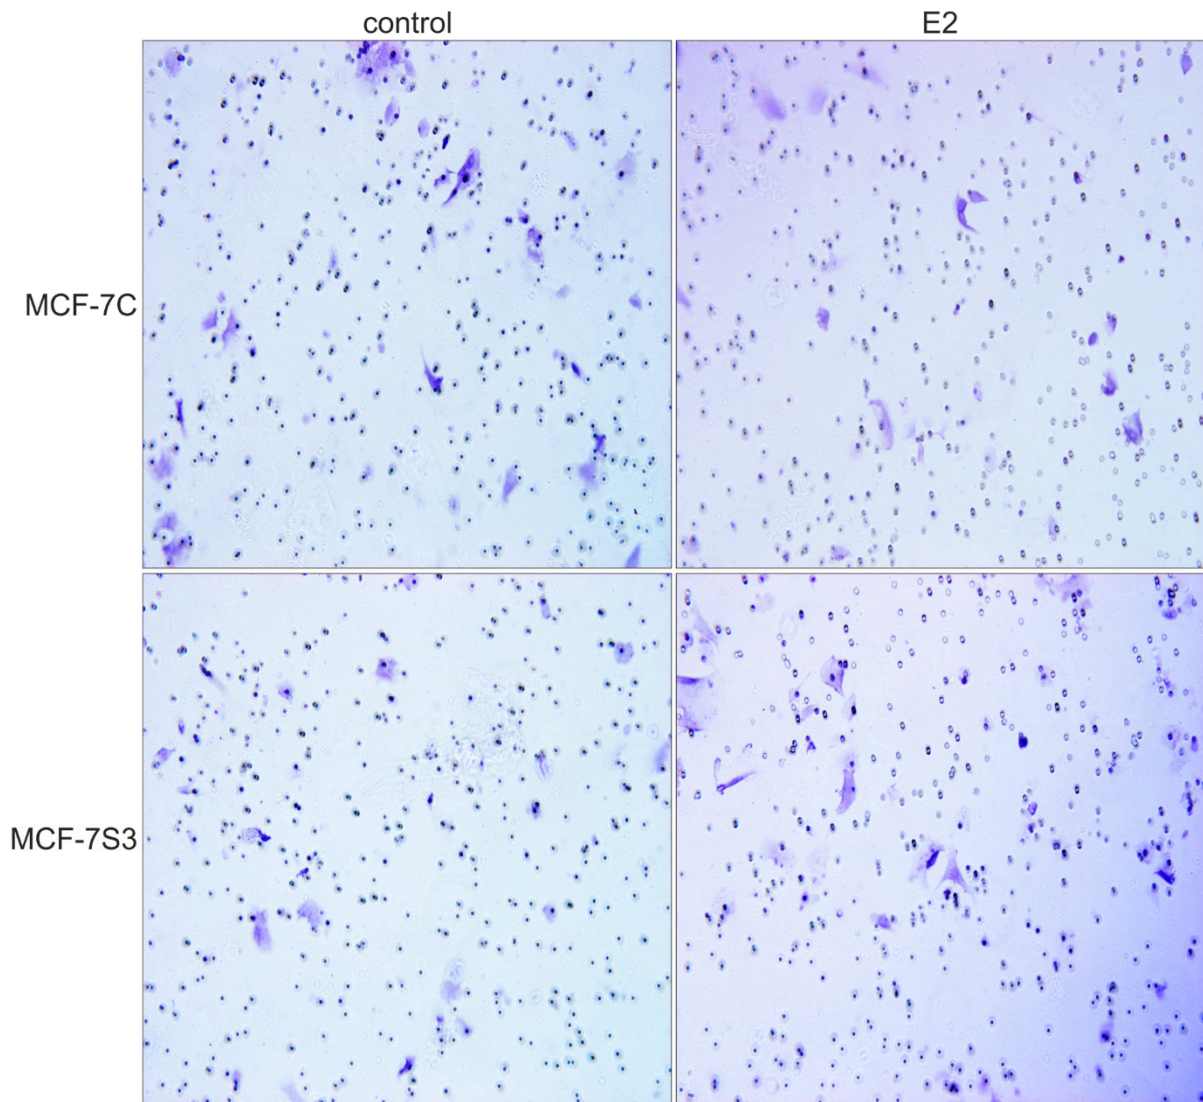

**Figure S2.** E2 partially rescues reduced migration of MCF-7S3 cells. Representative photographs of migrated MCF-7C and MCF-7S3 cells treated with E2. Samples are stained with crystal violet.
